# Supplementary material for: Divergent regulation of Arabidopsis SAUR genes: a focus on the SAUR10-clade
Source: PubMed Central journal article supplement (PMC5735953; doi:10.1186/s12870-017-1210-4), 2017-12-19
Supplement: 12870_2017_1210_MOESM1_ESM.pdf [file 12870_2017_1210_MOESM1_ESM.pdf]

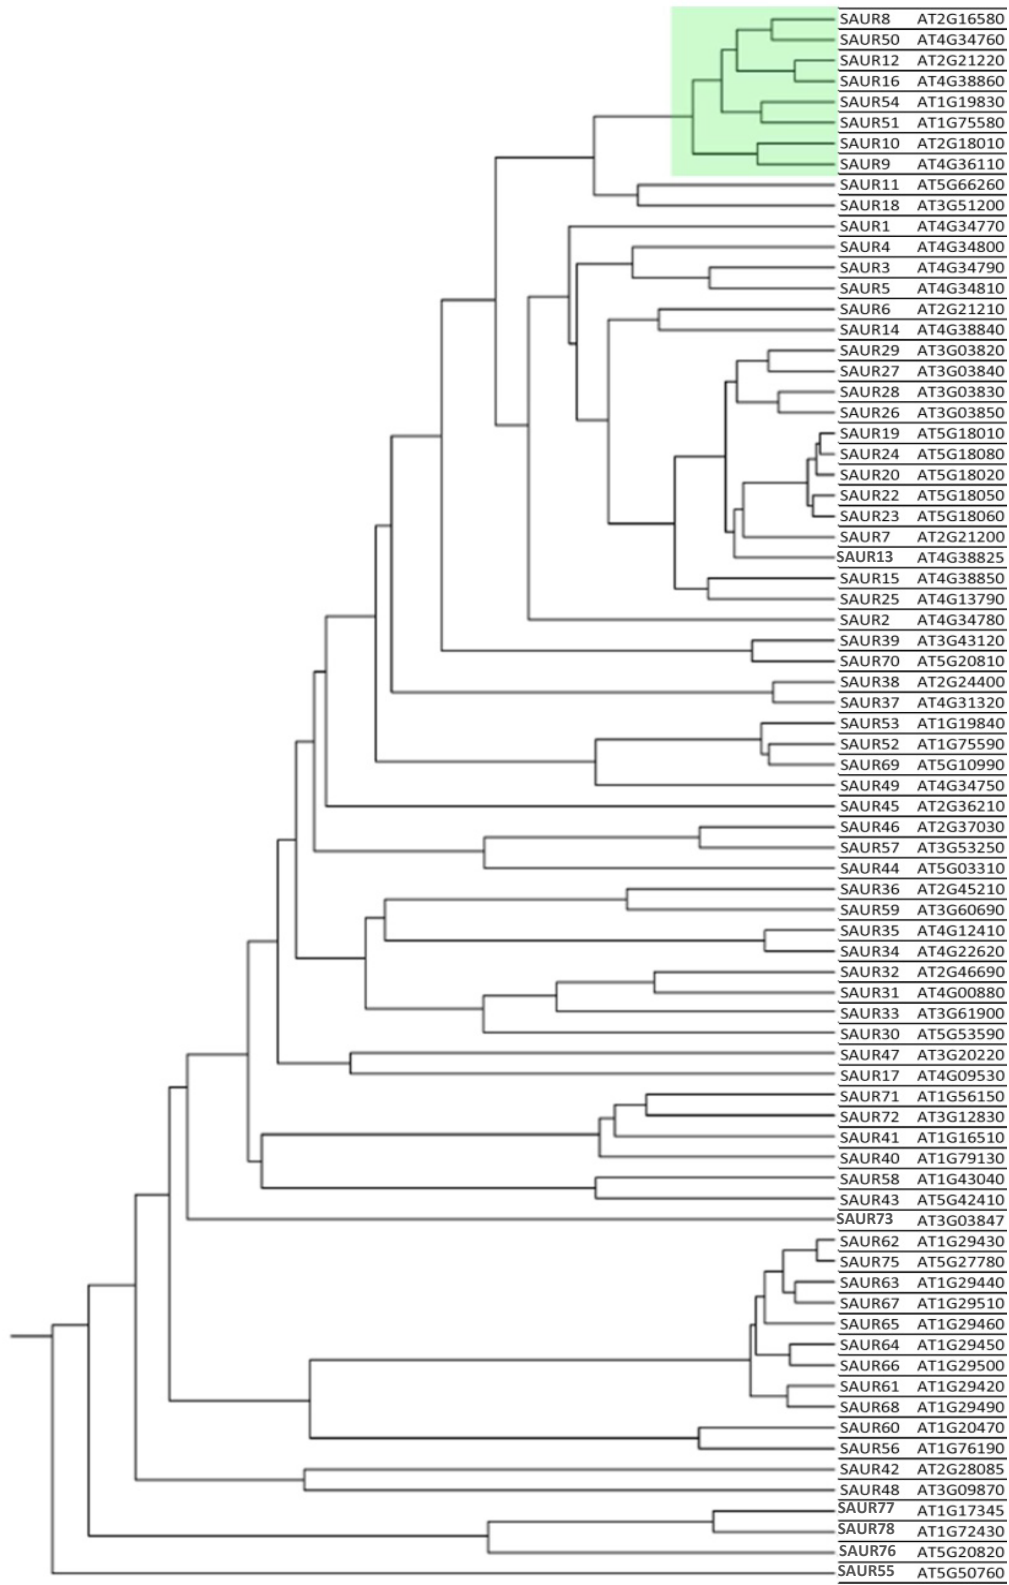

Additional file 1: Figure S1. UPGMA tree of the Arabidopsis SAUR proteins.
