# Supplementary material for: Divergent regulation of Arabidopsis SAUR genes: a focus on the SAUR10-clade
Source: PubMed Central journal article supplement (PMC5735953; doi:10.1186/s12870-017-1210-4), 2017-12-19
Supplement: 12870_2017_1210_MOESM3_ESM.pdf [file 12870_2017_1210_MOESM3_ESM.pdf]

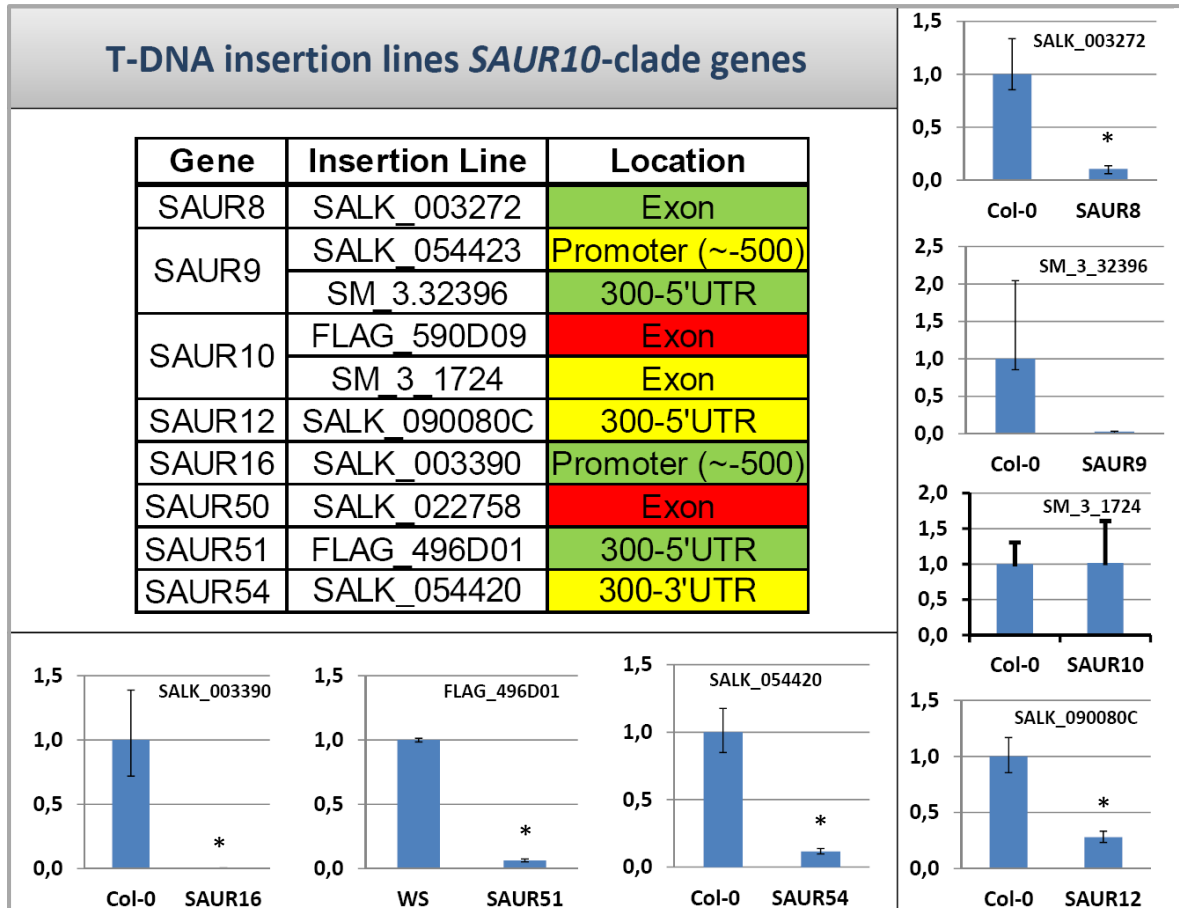

**Additional file 3: Figure S2. Analysis of the T-DNA insertion lines.** The table shows the different lines that were tested. Insertions could not always be identified in the coding sequence, due to the small size of the intronless SAUR genes (~350 bp). Green marked lines could be confirmed by genotyping and are probably knock-out lines. Yellow marked lines could be confirmed by genotyping, but are only partially impaired in expression (T-DNA in upstream region). Red marked lines could not be confirmed and do not appear to contain the insertion. The panels on the side show the expression analysis of the SAUR10-clade genes in the corresponding insertion lines. The qPCRs were performed with inflorescence tissue. The graph shows the relative fold change compared with the corresponding wild-type line. Significant differences (T-test, p<0.05) are indicated with an asterisk.

The following double and triple mutants were generated: *saur12 saur16*; *saur50 saur8*; *saur12 saur16*; *saur12 saur16 saur54*; *saur12 saur16 saur50*; *saur12 saur16 saur8*; *saur10 saur9*. No aberrant phenotypes were observed in any of these mutants.
