# Supplementary material for: Divergent regulation of Arabidopsis SAUR genes: a focus on the SAUR10-clade
Source: PubMed Central journal article supplement (PMC5735953; doi:10.1186/s12870-017-1210-4), 2017-12-19
Supplement: 12870_2017_1210_MOESM6_ESM.pdf [file 12870_2017_1210_MOESM6_ESM.pdf]

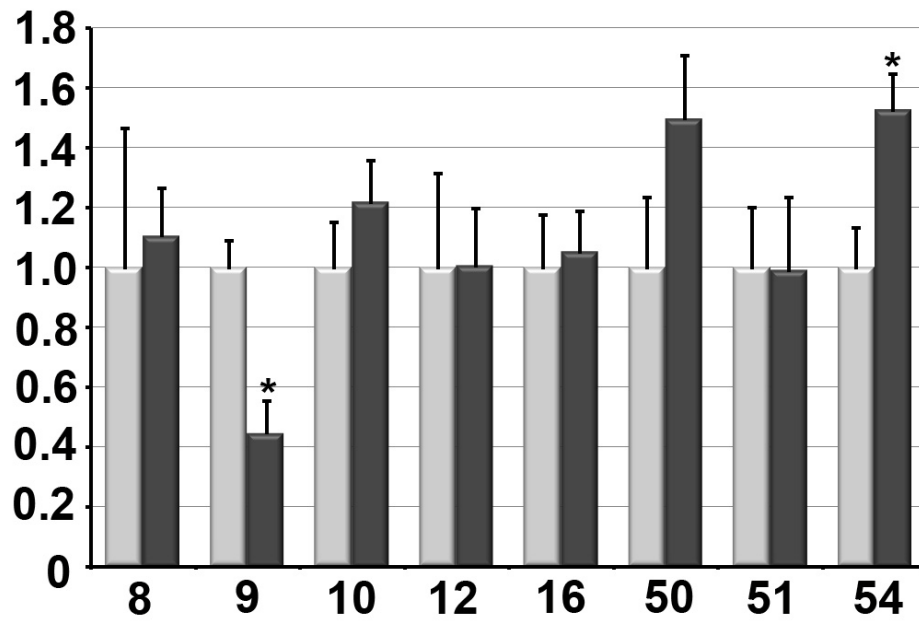

**Additional file 6: Figure S5. Response of *SAUR10*clade genes to GA application.** Expression of the *SAUR10* clade genes in seedlings after 4 hours of 100  $\mu$ M GA3 treatment relative to the expression in mock treated seedlings. The error bars represent the SE based on three or four biological replicas. Significant differences (t-test,  $p < 0.05$ ) are indicated with an asterisk.
