# Supplementary material for: Divergent regulation of Arabidopsis SAUR genes: a focus on the SAUR10-clade
Source: PubMed Central journal article supplement (PMC5735953; doi:10.1186/s12870-017-1210-4), 2017-12-19
Supplement: 12870_2017_1210_MOESM7_ESM.pdf [file 12870_2017_1210_MOESM7_ESM.pdf]

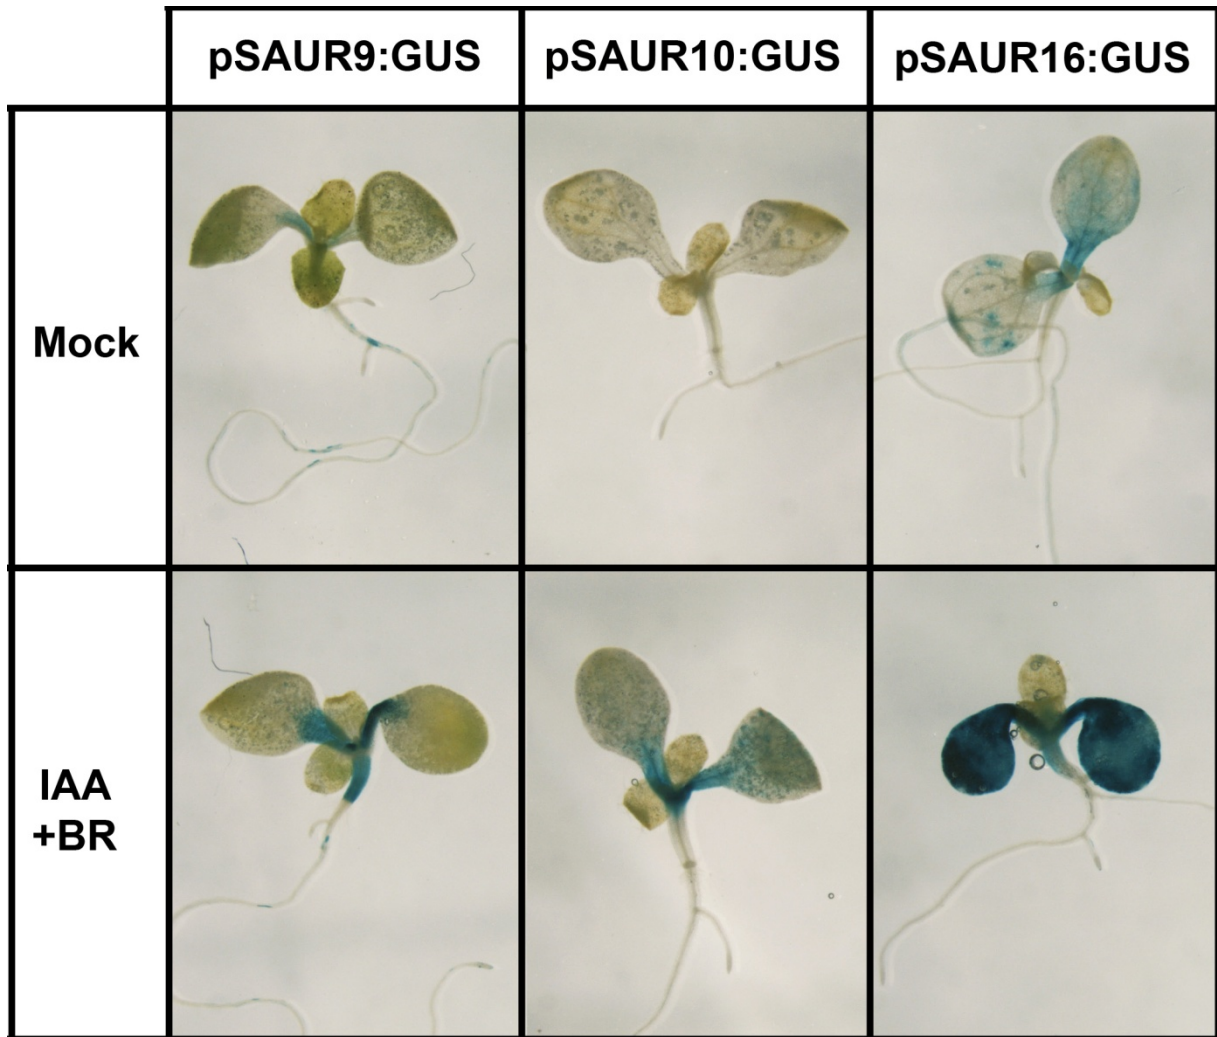

**Additional file 7: Figure S6. The location of GUS expression does not change after IAA-BR treatment.** Location of the GUS signal in 8-day old seedlings of *pSAUR9:GUS*, *pSAUR10:GUS* and *pSAUR16:GUS* after 4 hrs of IAA-BR treatment compared to 4 hrs of Mock treatment. To visualize the difference in GUS intensity, the seedlings were stained in GUS buffer for 4 hrs only.
